# Supplementary material for: Clonal Hematopoiesis of Indeterminate Potential From a Heart Failure Specialist's Point of View
Source: PubMed Central journal article supplement (PMC10492961; doi:10.1161/jaha.123.030603), 2023-07-25
Supplement: JAH3-12-e030603-s001.pdf [file JAH3-12-e030603-s001.pdf]

# Supplemental Material

**Table S1. murine studies on the effect of clonal hematopoiesis in heart failure.**

| First author (year)       | Cases                                                                                                                                                                                               | Controls                                                                                                                                        | Additional interventions                                                | Outcome                                                                                                                                                                                                                                                                                                                                                     |
|---------------------------|-----------------------------------------------------------------------------------------------------------------------------------------------------------------------------------------------------|-------------------------------------------------------------------------------------------------------------------------------------------------|-------------------------------------------------------------------------|-------------------------------------------------------------------------------------------------------------------------------------------------------------------------------------------------------------------------------------------------------------------------------------------------------------------------------------------------------------|
| Sano <sup>10</sup> (2018) | Mice with bone marrow radiation followed by bone marrow transplantation with <i>Tet2</i> deficient ( <i>Tet2</i> +/- or <i>Tet2</i> -/-) or <i>Dnmt3a</i> loss-of-function cells                    | Mice with bone marrow radiation followed by bone marrow transplantation with control cells                                                      | Angiotensin II in a subgroup of mice.                                   | Bone marrow transplantation with <i>Tet2</i> -deficient or <i>Dnmt3a</i> loss-of-function mutated cells led to increased cardiac inflammation (IL-1, IL-6, CXCL1, CXCL2), hypertrophy and fibrosis and a decreased ejection fraction, compared to controls.                                                                                                 |
| Sano <sup>11</sup> (2018) | Mice with bone marrow radiation followed by bone marrow transplantation with <i>Tet2</i> deficient ( <i>Tet2</i> +/- or <i>Tet2</i> -/-) cells, additionally these mice TAC or ligation of the LAD. | Mice with bone marrow radiation followed by bone marrow transplantation with control cells, additionally these mice had TAC or ligation of LAD. | Inhibition of the NLRP3-inflammasome with MCC950 in a subgroup of mice. | Bone marrow transplantation with <i>Tet2</i> -deficient cells led to decreased ejection fraction and increased inflammation (IL-1, CXCL2, CD45) and fibrosis in mice with TAC or ligation of the LAD. The NLRP3-inflammasome inhibitor MCC950 reversed post-infarction and pressure overload remodeling caused by the CHIP-driver mutation in <i>Tet2</i> . |

**Table S1 (continued): murine studies on the effect of clonal hematopoiesis in heart failure**

| First author (year)       | Cases                                                                                                                                               | Controls                                                                                                                          | Additional interventions | Outcome                                                                                                                                                                                                                                                                                                                                                                                                                                                                                                                                                                                                                         |
|---------------------------|-----------------------------------------------------------------------------------------------------------------------------------------------------|-----------------------------------------------------------------------------------------------------------------------------------|--------------------------|---------------------------------------------------------------------------------------------------------------------------------------------------------------------------------------------------------------------------------------------------------------------------------------------------------------------------------------------------------------------------------------------------------------------------------------------------------------------------------------------------------------------------------------------------------------------------------------------------------------------------------|
| Sano <sup>12</sup> (2019) | Non-irradiated mice with bone marrow transplantation from <i>Jak2</i> (V617F) mutated mice, additionally these mice had TAC or ligation of the LAD. | Non-irradiated mice with bone marrow transplantation from wild-type mice, additionally these mice had TAC or ligation of the LAD. | None                     | Bone marrow transplantation with <i>Jak2</i> (V617F) mutated bone marrow cells led to increase cardiac inflammation (IL-1, IL-6, TNF-alpha) and fibrosis and a decreased ejection fraction in mice with TAC or ligation of the LAD. <i>Jak2</i> (V617F) expressing HSPCs displayed a competitive advantage over <i>Jak2</i> (wild-type) HSPCs that was highly restricted to the myeloid lineage and shown as an increase of mutated neutrophils and monocytes in the blood.                                                                                                                                                     |
| Wang <sup>14</sup> (2020) | Non-irradiated mice with bone marrow transplantation from <i>Tet2</i> deficient mice ( <i>Tet2</i> +/- or <i>Tet2</i> -/-)                          | Non-irradiated mice with bone marrow transplantation from wild-type ( <i>Tet2</i> +/+) mice                                       | None                     | Bone marrow transplantation with <i>Tet2</i> -deficient cells led to progressive expansion of <i>Tet2</i> -deficient HSPCs as well as expansion of <i>Tet2</i> -deficient bone marrow derived myeloid cells within the heart, without an significant effect on yolk sac-derived cardiac-resident macrophages. Consecutively, there was a reduction in ejection fraction parallel to an increase in hypertrophy. Of note: this was the first study that showed a detrimental effect of the <i>Tet2</i> -driver mutation without an external injury (LAD ligation, TAC, or infusion with angiotensin II) or <i>Ldlr</i> knockout. |

**Table S1 (continued): murine studies on the effect of clonal hematopoiesis in heart failure**

| First author (year)       | Cases                                                                                                                                    | Controls                                                                                                                               | Additional interventions                                                          | Outcome                                                                                                                                                                                                                                                                                                                                  |
|---------------------------|------------------------------------------------------------------------------------------------------------------------------------------|----------------------------------------------------------------------------------------------------------------------------------------|-----------------------------------------------------------------------------------|------------------------------------------------------------------------------------------------------------------------------------------------------------------------------------------------------------------------------------------------------------------------------------------------------------------------------------------|
| Yura <sup>15</sup> (2021) | Mice with bone marrow radiation followed by bone marrow transplantation with <i>ppm1d</i> gain-of-function mutation                      | Mice with bone marrow radiation followed by bone marrow transplantation with control cells                                             | Angiotensin II and the NLRP3-inflammasome inhibitor MCC950 in a subgroup of mice. | The <i>ppm1d</i> mutation reduced left ventricle fraction shortening at 4 weeks and lead to an higher fibrotic cardiac tissue area parallel to higher bone marrow-derived (CCR2) macrophages/monocytes with higher IL1- $\beta$ and IL-6 expression. This was abrogated by CCR2 knock-out or by the NLRP3 inflammasome inhibitor MCC950. |
| Sano <sup>13</sup> (2021) | Non-irradiated mice with bone marrow transplantation from <i>Trp53</i> heterozygous-deficient ( <i>Trp53</i> <sup>+/-</sup> ) donor mice | Non-irradiated mice with bone marrow transplantation from <i>Trp53</i> homozygous wild type ( <i>Trp53</i> <sup>+/+</sup> ) donor mice | Doxorubicin in a subgroup of mice.                                                | Doxorubicine led to expansion of <i>Trp53</i> -deficient HSPCs, myocardial neutrophil infiltration that produced IL-1 $\beta$ , IL-6 and TNF- $\alpha$ (without increased monocyte infiltration), and worse left ventricle systolic function. Neutrophil depletion prevented cardiac dysfunction.                                        |

CD = cluster of differentiation; CHIP = clonal haematopoiesis of indeterminate potential; CCR2 = C-C chemokine receptor 2; CXCL = chemokine (X-C-X) motif ligand; DNMT3A = DNA (cytosine-5)-methyltransferase 3A; HSPCs = hematopoietic stem and progenitor cells; IL = interleukin; JAK2 = Janus Kinase 2; LAD = left anterior descending artery; LDLR = low density lipoprotein receptor; NLRP3 = NLR family pyrin domain containing 3; TAC = transverse aortic constriction; TET2 = Tet methylcytosine dioxygenase 2; TNF = tumor necrosis factor; Trp53 = transformation related protein 53.
